# Supplementary material for: Interpersonal Psychotherapy for Mental Health Problems: A Comprehensive Meta-Analysis
Source: Atypon-hosted journal article supplement (doi:10.1176/appi.ajp.2015.15091141), 2016-04-01
Supplement: appi.ajp.2015.15091141.ds001.pdf [file appi.ajp.2015.15091141.ds001.pdf]

Appendix A. Flowchart inclusion of studies

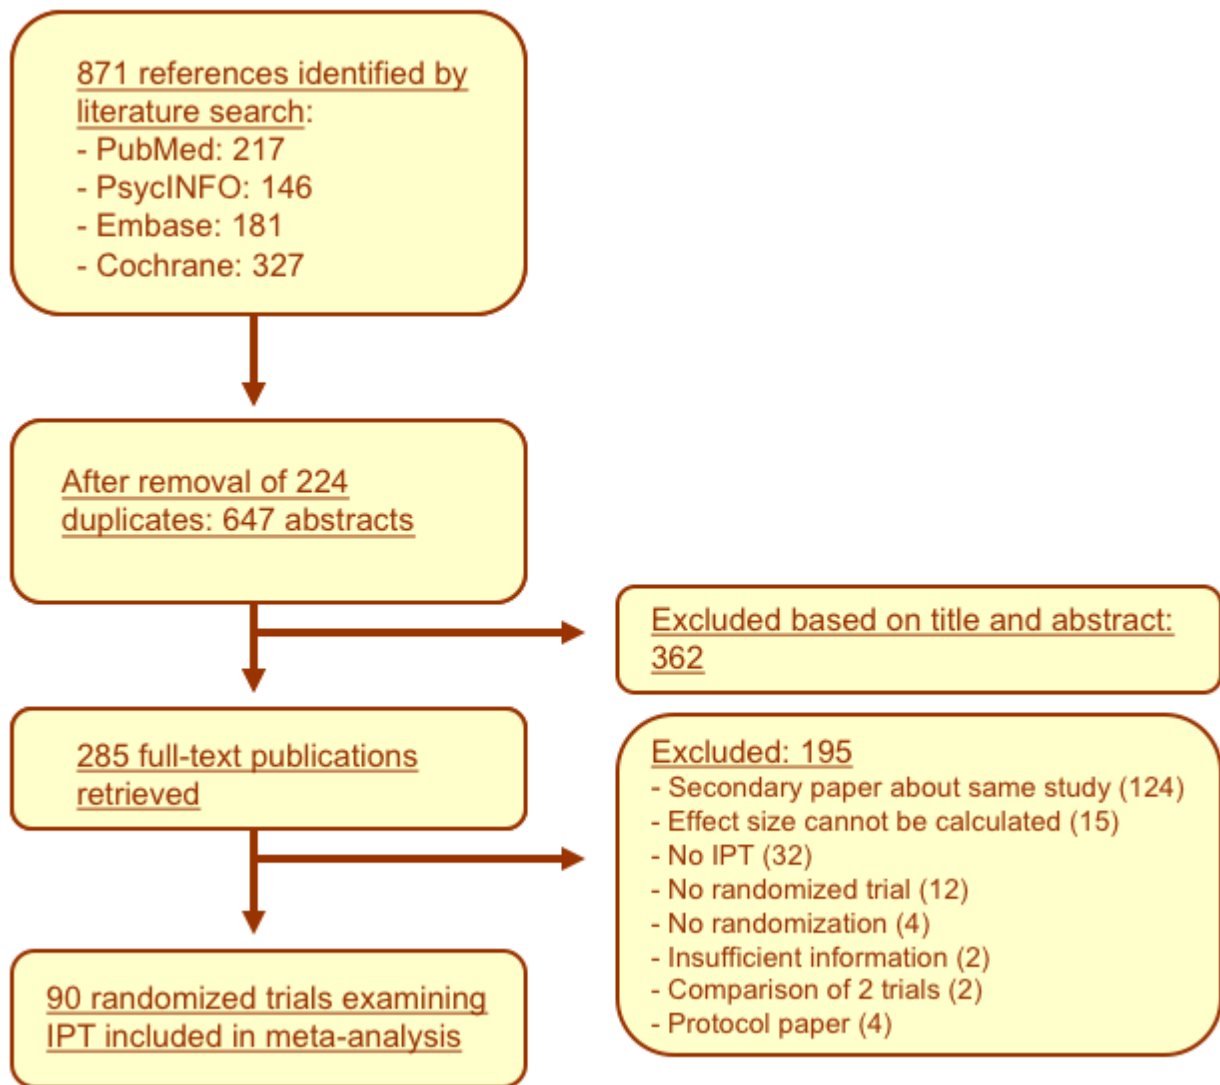

## Appendix B. References of included studies

- Agras WS, Walsh T, Fairburn CG, Wilson GT, Kraemer HC. A multicenter comparison of cognitive-behavioral therapy and interpersonal psychotherapy for bulimia nervosa. *Arch Gen Psychiatry* 2000; 57: 459-466.
- Badger TA, Segrin C, Figueredo AJ, Harrington J, Sheppard K, Passalacqua S, Pasvogel A, Bishop M. Psychosocial interventions to improve quality of life in prostate cancer survivors and their intimate or family partners. *Qual Life Res* 2011; 20: 833-844.
- Badger T, Segrin C, Pasvogel A, Lopez AM. The effect of psychosocial interventions delivered by telephone and videophone on quality of life in early-stage breast cancer survivors and their supportive partners. *J Telemed Telecare* 2013; 19: 260-265.
- Badger TA, Segrin C, Hepworth JT, Pasvogel A, Weihs K, Lopez AM. Telephone-delivered health education and interpersonal counseling improve quality of life for Latinas with breast cancer and their supportive partners. *Psycho-Oncol* 2013; 22: 1035-1042.
- Badger T, Segrin C, Dorros SM, Meek P, Lopez AM. Depress Anxiety in women with breast cancer and their partners. *Nurs Res* 2007; 56: 44-53.
- Beeber LS, Schwartz TA, Holditch-Davis D, Canuso R, Lewis V, Wilde Hall H. Parenting enhancement, interpersonal psychotherapy to reduce depression in low-income mothers of infants and toddlers: A randomized trial. *Nurs Res* 2013; 62: 82-90.
- Bellino S, Zizza M, Rinaldi C, Bogetto F. Combined treatment of major depression in patients with borderline personality disorder: A comparison with pharmacotherapy. *Can J Psychiatry* 2006; 51: 453-460.
- Bellino S, Rinaldi C, Bogetto F. Adaptation of interpersonal psychotherapy to borderline personality disorder: A comparison of combined therapy and single pharmacotherapy. *Can J Psychiatry* 2010; 55: 74-81.
- Blom MB, Spinhoven P, Hoffman T, Jonker K, Hoencamp E, Haffmans PMJ, van Dyck R. Severity and duration of depression, not personality factors, predict short term outcome in the treatment of major depression. *J Affect Disord* 2007; 104: 119-126.
- Bodenmann G, Plancherel B, Beach SRH, Widmer K, Gabriel B, Meuwly N, Charvoz L, Hautzinger M, Schramm E. Effects of coping-oriented couples therapy on depression: a randomized clinical trial. *J Consult Clin Psychol* 2008; 76: 944-954.
- Bolton P, Bass J, Neugebauer R, Verdeli H, Clougherty KF, Wickramaratne P, Speelman L, Ndogoni L, Weissman M. Group interpersonal psychotherapy for depression in rural Uganda: A randomized controlled trial. *JAMA* 2003; 289: 3117-3124.
- Bolton P, Bass J, Betancourt T, Speelman, L Onyango G, Clougherty KF, Neugebauer R, Murray L, Verdeli H. Interventions for depression symptoms among adolescent survivors of war and displacement in Northern Uganda: A randomized controlled trial. *JAMA* 2007; 298: 519-527.
- Borge FM, Hoffart A, Sexton H, Clark DM, Markowitz JC, McManus F. Residential cognitive therapy versus residential interpersonal therapy for social phobia: A randomized clinical trial. *J Anxiety Disord* 2008; 22: 991-1010.
- Browne G, Steiner M, Roberts J, Gafni A, Byrne C, Dunn E, Bell B, Mills M, Chalklin L, Wallik D, Kraemer J. Sertraline and/or interpersonal psychotherapy for patients with dysthymic disorder in primary care: 6-Month comparison with longitudinal 2-year follow-up of effectiveness and costs. *J Affect Disord* 2002; 68: 317-330.
- Carroll KM, Rounsaville BJ, Gawin FH. A comparative trial of psychotherapies for ambulatory cocaine abusers: relapse prevention and interpersonal psychotherapy. *Am J Drug Alcohol Abuse* 1991; 17: 229-247.
- Clark R, Tluczek A, Wenzel A. Psychotherapy for Postpartum Depression: A Preliminary Report. *Am J Orthopsychiatry* 2003; 73: 441-454.
- Dagoo J, Persson Asplund R, Andersson Bsenko H, Hjerling S, Holmberg A, Westh S, Oberg L, Ljotsson B, Carlbring P, Furmark T, Andersson G. Cognitive behavior therapy versus

- interpersonal psychotherapy for social anxiety disorder delivered via smartphone and computer: A randomized controlled trial. *J Anxiety Disord* 2014; 28: 410-417.
- de Mello MF, Myczkowisk LM, Menezes PR. A randomized controlled trial comparing moclobemide and moclobemide plus interpersonal psychotherapy in the treatment of dysthymic disorder. *J Psychother Pract Res* 2001; 10: 117-123.
- Donker T, Bennett K, Bennett A, Mackinnon A, van Straten A, Cuijpers P, Christensen H, Griffiths KM. Internet-delivered interpersonal psychotherapy versus internet-delivered cognitive behavioral therapy for adults with depressive symptoms: randomized controlled noninferiority trial. *JMIR* 2013; 15: e82.
- Elkin I, Shea T, Watkins JT, Imber SD, Sotsky SM, Collins JF, Glass DR, Pilkonis PA, Leber WR, Docherty JP, Fiester SJ, Parloff MB. National Institute of Mental Health Treatment of Depression Collaborative Research Program. General effectiveness of treatments. *Arch Gen Psychiatry* 1989; 46: 971-982.
- Fairburn CG, Jones R, Peveler RC, Carr SJ, Solomon RA, O'Connor ME, Burton J, Hope RA. Three psychological treatments for bulimia nervosa. A comparative trial. *Arch Gen Psychiatry* 1991; 48: 463-469.
- Field T, Diego M, Delgado J, Medina L. Peer support and interpersonal psychotherapy groups experienced decreased prenatal depression, anxiety and cortisol. *Early Hum Dev* 2013; 89: 621-624.
- Finkenzeller W, et al. [Interpersonal psychotherapy and pharmacotherapy for post-stroke depression. Feasibility and effectiveness]. *Nervenarzt* 2009; 80: 805-812.
- Frank E, Kupfer DJ, Perel JM, Cornes C, Jarrett DB, Mallinger AG, Thase ME, McEachran AB, Grochocinski VJ. Three-year outcomes for maintenance therapies in recurrent depression. *Arch Gen Psychiatry* 1990; 47: 1093-1099.
- Frank E, Cassano GB, Rucci P, Thompson WK, Kraemer HC, Fagiolini A, Maggi L, Kupfer DJ, Shear MK, Houck PR, Calugi S, Grochocinski VJ, Scocco P, Battenfield J, Forgiione RN. Predictors and moderators of time to remission of major depression with interpersonal psychotherapy and SSRI pharmacotherapy. *Psychol Med* 2011;41: 151-162.
- Gao L-l, Chan SWC, Li X, Chen S, Hao Y. Evaluation of an interpersonal-psychotherapy-oriented childbirth education programme for Chinese first-time childbearing women: A randomised controlled trial. *Int J Nurs Stud* 2010; 47: 1208-1216.
- Gois C, Dias VV, Carmo I, Durarte R, Ferro A, Santos AL, Sousa f, Barbosa A. Treatment response in type 2 diabetes patients with major depression. *Clin Psychol Psychother* 2014; 21: 39-48.
- Grote NK, Swartz HA, Geibel SL, Zuckoff A, Houck PR, Frank E. A randomized controlled trial of culturally relevant, brief interpersonal psychotherapy for perinatal depression. *Psychiatr Serv* 2009; 60: 313-321.
- Holmes A, Hodgins G, Adey S, Menzel, S, Danne P, Kossmann T, Judd F. Trial of interpersonal counselling after major physical trauma. *Aust N Z J Psychiatry* 2007; 41: 926-933.
- Horowitz JL, Gabrber J, Ciesla JA, Young JF, Mufson L. Prevention of depressive symptoms in adolescents: A randomized trial of cognitive-behavioral and interpersonal prevention programs. *J Consult Clin Psychol* 2007, 75: 693-706.
- Johnson JE, Zlotnick C. Pilot study of treatment for major depression among women prisoners with substance use disorder. *J Psychiatr Res* 2012; 46: 1174-1183.
- Klerman GL, Budman S, Berwick D, Weissman MM, Damico-White J, Demby A, Feldstein M. Efficacy of a brief psychosocial intervention for symptoms of stress and distress among patients in primary care. *Med Care* 1987; 25: 1078-1088.
- Koszycki D, Bisscherbe J-C, Blier P, Bradwejn J, Markowitz J. Interpersonal psychotherapy versus brief supportive therapy for depressed infertile women: First pilot randomized controlled trial. *Arch Womens Ment Health* 2012; 15: 193-201.
- Krupnick JL, Green BL, Stockton P, Miranda J, Krause E, Mete M. Group interpersonal psychotherapy for low-income women with posttraumatic stress disorder. *Psychother Res* 2008; 18: 497-507.

- Lesperance F, Frasere-Smith N, Koszycki D, Laliberte MA, van Zyl LT, Baker B, Swenson JR, Ghatavi K, Abramson BL, Dorian P, Guertin MC. Effects of citalopram and interpersonal psychotherapy on depression in patients with coronary artery disease: The Canadian Cardiac Randomized Evaluation of Antidepressant and Psychotherapy Efficacy (CREATE) trial. *JAMA* 2007; 297: 367-379.
- Levkovitz Y, Shahar G, Nativ G, Hirschfeld E, Treves I, Krieger I, Fennig S. Group interpersonal psychotherapy for patients with major depression disorder—pilot study. *J Affect Disord* 2000; 60: 191-195.
- Lipsitz JD, Gur M, Vernes D, Petkova E, Cheng J, Miller N, Laino J, Liebowitz MR, Fyer AJ. A randomized trial of interpersonal therapy versus supportive therapy for social anxiety disorder. *Depress Anx* 2008; 25: 542-553.
- Luty SE, Carter JD, McKenzie JM, Rae AM, Frampton CMA, Mulder RT, Joyce PR. Randomised controlled trial of interpersonal psychotherapy and cognitive-behavioural therapy for depression. *Br J Psychiatry* 2007; 190: 496-502.
- Markowitz JC, Kocsis JH, Fishman B, Spielman LA, Jacobsberg LB, Frances AJ, Klerman GL, Perry SW. Treatment of depressive symptoms in human immunodeficiency virus-positive patients. *Arch Gen Psychiatry* 1998; 55: 452-457.
- Markowitz JC, Kocsis JH, Bleiberg KL, Christos PJ, Sacks M. A comparative trial of psychotherapy and pharmacotherapy for 'pure' dysthymic patients. *J Affect Disord* 2005; 89: 167-175.
- Markowitz JC, Kocsis JH, Christos P, Bleiberg K, Carlin A. Pilot study of interpersonal psychotherapy versus supportive psychotherapy for dysthymic patients with secondary alcohol abuse or dependence. *J Nerv Ment Dis.* 2008; 196: 468-474.
- Marshall C, Zuroff DC, McBride C, Bagby RM. Self-Criticism Predicts Differential Response to Treatment for Major Depression. *J Clin Psychol* 2008; 64:231-244.
- Martin SD, Martin E, Rai SS, Richardson MA, Royall R. Brain blood flow changes in depressed patients treated with interpersonal psychotherapy or venlafaxine hydrochloride: preliminary findings. *Arch Gen Psychiatry* 2001; 58: 641-648.
- McIntosh VV, Jordan, J, Carter FA, Luty SE, Mckenzie JM, Bulik CM, Frampton CMA, Joyce PR. Three psychotherapies for anorexia nervosa: a randomized, controlled trial. *Am J Psychiatry* 2005; 162: 741-747.
- Meffert SM, Abdo AO, Alla OAA, Elmakki YOM, Omer, AA, Yousif S, Metzler TJ, Marmar CR. A pilot randomized controlled trial of interpersonal psychotherapy for Sudanese refugees in Cairo, Egypt. *Psychol Trauma* 2014; 6: 240-249.
- Menchetti M, Rucci P, Bortolotti B, Bombi A, Scocco P, Kraemer HC, Berardi D. Moderators of remission with interpersonal counselling or drug treatment in primary care patients with depression: Randomised controlled trial. *Br J Psychiatry* 2014; 204: 144-150.
- Miklowitz DJ, Otto MW, Frank E, Reilly-Harrington NA, Wisniewski SR, Kogan JN, Nierenberg AA, Calabrese JR, Marangell LB, Gyulai L, Araga M, Gonzalez JM, Shirley ER, Thase ME, Sachs GS. Psychosocial treatments for bipolar depression: A 1-year randomized trial from the Systematic Treatment Enhancement Program. *Arch Gen Psychiatry* 2007; 64: 419-427.
- Miller L, Weissman M. Interpersonal psychotherapy delivered over the telephone to recurrent depressives: A pilot study. *Depress Anx* 2002; 16: 114-117.
- Mitchell JE, Halmi K, Wilson T, Agras WS, Kraemer H, Crow S. A randomized secondary treatment study of women with bulimia nervosa who fail to respond to CBT. *Int J Eat Disord* 2002; 32: 271-281.
- Mossey JM, Knott, KA, Higgins M, Talerico K. Effectiveness of a psychosocial intervention, interpersonal counseling, for subdysthymic depression in medically ill elderly. *J Gerontol A Biol Sci Med Sci* 1996; 51A: M172-M178.
- Mufson L, Weissman MM, Moreau D, Garfinkel R. Efficacy of interpersonal psychotherapy for depressed adolescents. *Arch Gen Psychiatry* 1999; 56: 573-579.

- Mufson L, Pollack Dorta K, Wickramaratne P, Nomura Y, Olfson M, Weissman MM. A randomized effectiveness trial of interpersonal psychotherapy for depressed adolescents. *Arch Gen Psychiatry* 2004; 61: 577-584.
- Mulcahy R, Reay RE, Wilkinson RB, Owen C. A randomised control trial for the effectiveness of group interpersonal psychotherapy for postnatal depression. *Arch Womens Ment Health* 2010; 13: 125-139.
- Muller-Popkes K, Hajak G. [Interpersonal psychotherapy in treatment of patients with primary insomnia-preliminary data of polysomnographic macro-analysis]. *Wien Med Wochenschr* 1996; 146:303-305.
- Neugebauer R, Kline J, Markowitz JC, Bleiberg KL, Baxi L, Rosing MA, Levin B, Keith J. Pilot randomized controlled trial of interpersonal counseling for subsyndromal depression following miscarriage. *J Clin Psychiatry* 2006; 67: 1299-1304.
- O'Hara MW, Stuart S, Gorman LL, Wenzel A. Efficacy of interpersonal psychotherapy for postpartum depression. *Arch Gen Psychiatry* 2000; 57: 1039-1045.
- Oranta O, Luutonen S, Salokangas RKR, Vahlberg T, Leino-Kilpi H. The outcomes of interpersonal counselling on depressive symptoms and distress after myocardial infarction. *Nord J Psychiatry* 2010; 64: 78-86.
- Poleshuck EL, Gamble SA, Bellenger K, Lu N, Tu Xin, Sorensen S, Giles DE, Talbot NL. Randomized controlled trial of interpersonal psychotherapy versus enhanced treatment as usual for women with co-occurring depression and pelvic pain. *J Psychosom Res.* 2014; 77: 264-272.
- Power MJ, Freeman C. A randomized controlled trial of IPT versus CBT in primary care: With some cautionary notes about handling missing values in clinical trials. *Clin Psychol Psychother* 2012;19: 159-169.
- Ransom D, Heckman TG, Anderson T, Garske J, Holroyd K, Basta T. Telephone-delivered, interpersonal psychotherapy for HIV-infected rural persons with depression: a pilot trial. *Psychiatr Serv* 2008;59: 871-877.
- Reynolds CF, Miller MD, Pasternak RE, Frank E, Perel JM, Cornes C, Houck PR, Mazumdar S, Dew MA, Kupfer DJ. Treatment of bereavement-related major depressive episodes in later life: a controlled study of acute and continuation treatment with nortriptyline and interpersonal psychotherapy. *Am J Psychiatry* 1999; 156: 202-208.
- Reynolds CF III, Frank E, Perel JM, Imber SD, Cornes C, Miller MD, Mazumdar S, Houck PR, Dew MA, Stack JA, Pollock BG, Kupfer DJ. Nortriptyline and interpersonal psychotherapy as maintenance therapies for recurrent major depression: A randomized controlled trial in patients older than 59 years. *JAMA* 1999; 281: 39-45.
- Reynolds CF III, Dew MA, Pollock BG, Mulsant BH, Frank E, Miller MD, Houck PR, Mazumdar S, Butters MA, Stack JA, Schlermitzauer MA, Whyte EM, Gildengers, Karp J, Lenze E, Szanto K, Bensasi S, Kupfer DJ. Maintenance Treatment of Major Depression in Old Age. *N Engl J Med* 2006; 354: 1130-1138.
- Reynolds CF III, Dew MA, Martire LM, Miller MD, Cyranowski JM, Lenze E, Whyte EM, Mulsant BH, Pollock BG, Karp JF, Gildengers A, Szanto K, Dombrovski AY, Andreescu C, Butters MA, Morse JQ, Houck PR, Bensasi S, Mazumdar S, Stack JA, Frank E. Treating depression to remission in older adults: A controlled evaluation of combined escitalopram with interpersonal psychotherapy versus escitalopram with depression care management. *Int J Geriatr Psychiatry* 2010; 25: 1134-1141.
- Rosselló J, Bernal G. The efficacy of cognitive-behavioral and interpersonal treatments for depression in Puerto Rican adolescents. *J Consult Clin Psychol* 1999; 67: 734-745.
- Rosselló J, Bernal G, Rivera-Medina C. Individual and group CBT and IPT for Puerto Rican adolescents with depressive symptoms. *Cultur Divers Ethnic Minor Psychol* 2008; 14: 234-245.
- Schaal S, Elbert T, Neuner F. Narrative exposure therapy versus interpersonal psychotherapy. A pilot randomized controlled trial with Rwandan genocide orphans. *Psychother Psychosom* 2009; 78: 298-306.

- Schramm E, van Calker D, Dykieriek P, Lieb K, Kech S, Zobel I, Leonhart R, Berger M. An intensive treatment program of interpersonal psychotherapy plus pharmacotherapy for depressed inpatients: acute and long-term results. *Am J Psychiatry* 2007;164: 768-777.
- Schramm E, Zobel J, Dykieriek P, Kech S, Brakemeier EL, Kulz A, Berger M. Cognitive behavioral analysis system of psychotherapy versus interpersonal psychotherapy for early-onset chronic depression: a randomized pilot study. *J Affect Disord* 2011;129, 109-116.
- Schulberg HC, Block MR, Madonia MJ, Scott P, Rodriguez E, Imber SD, Perel J, Lave J, Houck PR, Coulehan JL. Treating major depression in primary care practice. Eight-month clinical outcomes. *Arch Gen Psychiatry* 1996; 53: 913-919.
- Serretti A, Fabbri C, Pellegrini S, Porcelli S, Politi P, Bellino S, Menchetti M, Mariotti V, Demi C, Martinelli V, Cappucciati M, Bozzatello P, Brignolo E, Brambilla P, Pae CU, Balestrieri M, De Ronchi D. No Effect of serotonergic gene variants on response to interpersonal counseling and antidepressants in major depression. *Psychiatry investigation* 2013; 10: 180-189.
- Shear K, Frank E, Houck PR, Reynolds CF. Treatment of complicated grief; A randomized controlled trial. *JAMA* 2005; 293: 2601-2608.
- Sloane HB, Staples FR, Schneider LS. Interpersonal therapy versus nortriptyline for depression in the elderly. *Psychogeriatr* 1985;55:344-345
- Spinelli MG, Endicott J. Controlled clinical trial of interpersonal psychotherapy versus parenting education program for depressed pregnant women. *Am J Psychiatry* 2003;160: 555-562.
- Stangier U, Schramm E, Heidenreich T, Berger M, Clark DM. Cognitive therapy vs interpersonal psychotherapy in social anxiety disorder: A randomized controlled trial. *Arch Gen Psychiatry* 2011; 68: 692-700.
- Swartz HA, Frank E, Zuckoff A, Cyranowski JM, Houck PR, Cheng Y, Fleming MAD, Grote NK, Brent DA, Shear MK. Brief interpersonal psychotherapy for depressed mothers whose children are receiving psychiatric treatment. *Am J Psychiatry* 2008; 165, 1155-1162.
- Talbot NL, Chaudron LH, Ward EA, Duberstein PR, Conwell Y, O'Hara MW, Tu X, Lu N, He H, Stuart S. A randomized effectiveness trial of interpersonal psychotherapy for depressed women with sexual abuse histories. *Psychiatr Serv* 2011;62: 374-380.
- Tang TC, Jou SH, Ko CH, Huang SY, Yen CF. Randomized study of school-based intensive interpersonal psychotherapy for depressed adolescents with suicidal risk and parasuicide behaviors. *Psychiatry Clin Neurosci* 2009; 63: 463-470.
- Tanofsky-Kraff M, Wilfley DE, Young JF, Mufson L, Yanovski SZ, Glasofer DR, Salaita CG, Schvey NA. A pilot study of interpersonal psychotherapy for preventing excess weight gain in adolescent girls at-risk for obesity. *Int J Eat Disord* 2010; 43: 701-706.
- van Schaik A, van Marwijk H, Ader H, van Dyck R, de Haan M, Penninx B, van der Kooij K, van Hout H, Beekman A. Interpersonal Psychotherapy for Elderly Patients in Primary Care. *Am J Geriatr Psychiatry* 2006;14: 777-786.
- Vos SPF, Huibers MJH, Diels L, Arntz A. A randomized clinical trial of cognitive behavioral therapy and interpersonal psychotherapy for panic disorder with agoraphobia. *Psychol Med* 2012; 42:2661-2672.
- Weissman MM, Prusoff BA, Dimascio A, Neu C, Goklaney M, Klerman GL. The efficacy of drugs and psychotherapy in the treatment of acute depressive episodes. *Am J Psychiatry* 1979; 136: 555-558.
- Wilfley DE, Agras WS, Telch CF, Rossiter EM, Schneider JA, Cole AG, Sifford LA, Raeburn SD. Group cognitive-behavioral therapy and group interpersonal psychotherapy for the nonpurging bulimic individual: a controlled comparison. *J Consult Clin Psychol* 1993; 61: 296-305.
- Wilfley DE, Welch RR, Stein RI, Spurrell EB, Cohen LR, Saelens BE, Douchis JZ, Frank MA, Wiseman CV, Matt GE. A randomized comparison of group cognitive-behavioral therapy and group interpersonal psychotherapy for the treatment of overweight individuals with binge-eating disorder. *Arch Gen Psychiatry* 2002; 59: 713-721.
- Wilson GT, Wilfley DE, Agras WS, Bryson SW. Psychological treatments of binge eating disorder. *Arch Gen Psychiatry* 2010;67: 94-101.

- Young JF, Mufson L, Davies M. Efficacy of Interpersonal Psychotherapy-Adolescent Skills Training: An indicated preventive intervention for depression. *J Child Psychol Psychiatry* 2006; 47: 1254-1262.
- Young JF, Mufson L, Gallop R. Preventing depression: A randomized trial of interpersonal psychotherapy-adolescent skills training. *Depress Anxiety* 2010; 27: 426-433.
- Zlotnick C, Johnson SL, Miller IW, Pearlstein T, Howard M. Postpartum depression in women receiving public assistance: pilot study of an interpersonal-therapy-oriented group intervention. *Am J Psychiatry* 2001;158: 638-640.
- Zlotnick C, Miller IW, Pearlstein T, Howard M, Sweeney P. A Preventive Intervention for Pregnant Women on Public Assistance at Risk for Postpartum Depression. *Am J Psychiatry* 2006; 163: 1443-1445.
- Zlotnick C, Capezza NM, Parker D. An interpersonally based intervention for low-income pregnant women with intimate partner violence: A pilot study. *Arch Womens Ment Health* 2011; 14: 55-65.

## Appendix C. Selected characteristics of included studies

| <i>Study</i>    | <i>Disorder</i>                                                                  | <i>Conditions</i>                               | <i>N</i>             | <i>Format</i>        | <i>N sess</i> | <i>Risk of bias<sup>a)</sup></i> | <i>Country</i> |
|-----------------|----------------------------------------------------------------------------------|-------------------------------------------------|----------------------|----------------------|---------------|----------------------------------|----------------|
| Agras, 2000     | Bulimia outpatients (DSM-III)                                                    | 1. IPT<br>2. CBT                                | 110<br>110           | Ind<br>Ind           | 19<br>19      | ++++                             | US             |
| Badger, 2007    | Breast cancer patients and their partners                                        | 1. IPC<br>2. Exercise<br>3. Attention control   | 38<br>23<br>37       | Tel<br>Tel           | 9<br>9        | --sr+                            | US             |
| Badger, 2011    | Prostate cancer survivors and their partners                                     | 1. IPC<br>2. Health education                   | 36<br>35             | Tel<br>Tel           | 12<br>12      | --sr+                            | US             |
| Badger, 2013a   | Early-stage breast cancer patients and their partners                            | 1. IPC - t<br>2. IPC -v<br>3. Health education  | 20<br>14<br>18       | Tel<br>Vid.ph<br>Tel | 12<br>12      | --sr-                            | US             |
| Badger, 2013b   | Latinas with breast cancer and their partners                                    | 1. IPC<br>2. Health education                   | 45<br>45             | Tel<br>Tel           | 12<br>12      | --sr-                            | US             |
| Beeber, 2013    | Depression in Low-Income Mothers of Infants and Toddlers                         | 1. IPT + PE<br>2. CAU                           | 114<br>112           | Ind +<br>tel         | 11            | +----                            | US             |
| Bellino, 2006   | Adults with borderline personality disorder and MDD                              | 1. IPT+ ADM<br>2. ADM                           | 20<br>19             | Ind                  | 24            | ---+-                            | IT             |
| Bellino, 2010   | Adults with borderline personality disorder                                      | 1. IPT + ADM<br>2. ADM                          | 27<br>28             | Ind                  | 34            | +--+-                            | IT             |
| Blom, 2007      | Adults with MDD                                                                  | 1. IPT<br>2. IPT+ ADM<br>3. ADM<br>4. IPT + ADM | 50<br>49<br>47<br>47 | Ind                  | 12            | --++                             | NL             |
| Bodenmann, 2008 | Adults <60 (and their partners) with MDD or DYS                                  | 1. IPT<br>2. COCT<br>3. CBT                     | 20<br>20<br>20       | Ind                  | 20            | ++-+                             | Swe            |
| Bolton, 2003    | Adults with MDD or subsyndromal depression                                       | 1. IPT<br>2. CAU                                | 107<br>117           | Grp                  | 16            | ++-+                             | UG             |
| Bolton, 2007    | Adolescent survivors of war and displacement with MDD or subsyndromal depression | 1. IPT<br>2. WL<br>3. Creative play             | 105<br>104<br>105    | Grp                  | 16            | +--+                             | UG             |
| Borge, 2008     | Inpatients with social anxiety disorder                                          | 1. IPT<br>2. CBT                                | 40<br>40             | Ind /<br>grp         | 50            | ??+-                             | NO             |
| Browne, 2002    | Adults with depression                                                           | 1. IPT<br>2. IPT+ADM<br>3. ADM                  | 178<br>212<br>196    | Ind                  | 10            | ++++                             | CA             |
| Carroll, 1991   | Adults with cocaine abuse                                                        | 1. IPT<br>2. Relapse prevent.                   | 21<br>21             | ind                  | 12            | ???+                             | US             |
| Clark, 2003     | Women with postpartum depression                                                 | 1. IPT<br>2. M-I therapy<br>3. Waiting list     | 15<br>13<br>11       | Grp                  | 12            | -??-                             | US             |
| Dagoo, 2014     | Social anxiety disorder                                                          | 1. mCBT<br>2. mIPT                              | 27<br>25             | SG                   | 9             | ++++                             | Swe            |
| de Mello, 2001  | Adults with MDD or DysDepression                                                 | 1. IPT+ADM<br>2. ADM                            | 16<br>19             | Ind                  | 16            | ++-+                             | BR             |
| Donker, 2013    | Adults with depression                                                           | 1. iIPT<br>2. iCBT<br>3. Active control         | 620<br>610<br>613    | SG                   | 4             | ++++                             | Austr          |
| Elkin, 1989     | Adults with MDD                                                                  | 1. IPT<br>2. CBT<br>3. ADM<br>4. Placebo        | 61<br>59<br>57<br>62 | Ind                  | 16            | ++++                             | US             |
| Fairburn, 1991  | Patients with bulimia                                                            | 1. CBT<br>2. BT<br>3. IPT                       | 25<br>24<br>24       | Ind                  | 19            | ??+-                             | UK             |
| Field, 2013     | Pregnant women with depression                                                   | 1. IPT<br>2. Peer support                       | 22<br>22             | Grp                  | 12            | ??sr?                            | US             |



|                    |                                                       |                                                                                         |                                  |              |         |          |       |
|--------------------|-------------------------------------------------------|-----------------------------------------------------------------------------------------|----------------------------------|--------------|---------|----------|-------|
| Finkenzeller, 2009 | Adults with depression                                | 1. IPT<br>2. IPT+ADM<br>3. ADM                                                          | 27<br>23<br>24                   | Grp          | 8       | -- ++    | Ger   |
| Frank, 1990        | Adults with MDD                                       | 1. mIPT+mADM<br>2. mADM<br>3. mIPT<br>4. mIPT + Plac<br>5. Placebo                      | 25<br>28<br>26<br>26<br>23       | Ind          | Monthly | -- ++    | US    |
| Frank, 2011        | Adults with depression                                | 1. IPT<br>2. ADM                                                                        | 160<br>158                       | Ind          | 12      | ?? ?+    | US    |
| Gao, 2010          | Pregnant women                                        | 1. IPT<br>2. Control                                                                    | 96<br>98                         | Grp /<br>ind | 3       | + ? sr + | China |
| Gois, 2014         | Type 2 diabetes patients with MDD                     | 1. IPT<br>2. ADM                                                                        | 17<br>17                         | Ind          | 12      | +++ -    | Port  |
| Grote, 2009        | Depressed pregnant women                              | 1. IPT<br>2. CAU                                                                        | 25<br>28                         | Ind          | 9       | ?? ?-    | US    |
| Holmes, 2007       | Patients with major physical trauma                   | 1. IPC<br>2. CAU                                                                        | 41<br>39                         | Ind          | Nr      | +++ -    | Austr |
| Horowitz, 2007     | Universal prevention of depression in adolescents     | 1. CBT<br>2. IPT<br>3. Control                                                          | 112<br>99<br>169                 | Grp          | 8       | + - sr + | US    |
| Johnson, 2012      | MDD among women prisoners with substance use disorder | 1. IPT<br>2. Attention control                                                          | 19<br>19                         | Grp /<br>ind | 27      | ? + + +  | US    |
| Klerman, 1974      | Adults with depression                                | 1. mIPT+mADM<br>2. mIPT + Plac<br>3. mIPT<br>4. mADM<br>5. Placebo<br>6. Clinical manag | 25<br>25<br>25<br>25<br>25<br>25 | Ind          | Week-ly | --- +    | US    |
| Koszycki, 2012     | Depressed infertile women                             | 1. IPT<br>2. Supportive ther.                                                           | 15<br>16                         | Ind          | 12      | ?? ?+    | CA    |
| Krupnick, 2008     | Low-income women with posttraumatic stress disorder   | 1. IPT<br>2. WL                                                                         | 32<br>19                         | Grp          | 16      | ?? ?+    | US    |
| Lesperance, 2007   | Depressed patients with coronary heart disease        | 1. IPT+ADM<br>2. ADM<br>3. IPT + Plac<br>4. Placebo                                     | 67<br>75<br>75<br>67             | Ind          | 12      | ++++     | CA    |
| Levkovitz, 2000    | Adults recovered from MDD                             | 1. mIPT+mADM<br>2. mADM                                                                 | 7<br>7                           | Grp          | 18      | ++ --    | IS    |
| Lipsitz, 2008      | Adults with social anxiety disorder                   | 1. IPT<br>2. Supportive ther                                                            | 36<br>34                         |              |         | + ? + -  |       |
| Luty, 2007         | Adults with MDD                                       | 1. IPT<br>2. CBT                                                                        | 91<br>86                         | Ind          | 16      | ++++     | UK    |
| Markowitz, 1998    | Adults with depression                                | 1. IPT<br>2. Supportive ther<br>3. CBT<br>4. Supp + ADM                                 | 24<br>24<br>27<br>26             | Ind          | 11      | ++++     | US    |
| Markowitz, 2005    | Adults with DYS                                       | 1. IPT<br>2. IPT+ADM<br>3. Supportive ther<br>4. ADM                                    | 23<br>21<br>26<br>24             | Ind          | 16      | ++++     | US    |
| Markowitz, 2008    | Adults with DYS                                       | 1. IPT<br>2. Supportive ther                                                            | 14<br>12                         | Ind          | 16      | + - ++   | US    |
| Marshall, 2008     | Adults with MDD                                       | 1. IPT<br>2. CBT<br>3. ADM                                                              | 35<br>37<br>30                   | Ind          | 16      | ----     | CA    |
| Martin, 2001       | Adults with MDD                                       | 1. IPT<br>2. ADM                                                                        | 13<br>15                         | Ind          | 16      | -- ++    | UK    |
| McIntosh, 2005     | Patients with Anorexia                                | 1. CBT<br>2. IPT<br>3. Supportive ther                                                  | 19<br>21<br>16                   | Ind          | 20      | ? ? ++   | UK    |

|                     |                                                   |                                                            |                       |              |              |          |       |
|---------------------|---------------------------------------------------|------------------------------------------------------------|-----------------------|--------------|--------------|----------|-------|
| Meffert, 2011       | Sudanese refugees with symptoms of PTSD           | 1. IPT<br>2. WL                                            | 13<br>9               | Ind          | 7            | + ? - +  | Egypt |
| Menchetti, 2014     | Primary care patients with depression             | 1. IPC<br>2. ADM                                           | 243<br>244            | Ind          | 6            | + + + +  | Italy |
| Miklowitz, 2007     | Patients with bipolar depression                  | 1. Collab care<br>2. CBT<br>3. IPT<br>4. Family foc. ther. | 130<br>75<br>62<br>26 | Ind          | 30           | ? ? - +  | US    |
| Miller, 2002        | Patients with recurrent depression                | 1. IPT-t<br>2. No treatment                                | 15<br>15              | Tel          | 12           | ? ? + -  | US    |
| Mitchell, 2002      | Bulimia patients who do not respond to CBT        | 1. IPT<br>2. Med manag                                     | 31<br>31              | Ind          | 20           | + ? ? -  | US    |
| Mossey, 1996        | Older adults with subdysthymic depression         | 1. IPT<br>2. CAU                                           | 31<br>38              | Ind          | 10           | ? ? sr - | US    |
| Mufson, 1999        | Depressed adolescents                             | 1. IPT<br>2. Monitoring                                    | 24<br>24              | Ind          | 12           | + - + +  | US    |
| Mufson, 2004        | Depressed adolescents                             | 1. IPT<br>2. CAU                                           | 34<br>29              | Ind          | 12           | + - + +  | US    |
| Mulcahy, 2010       | Adults with MDD                                   | 1. IPT<br>2. CAU                                           | 29<br>28              | Grp          | 10           | + - + +  | Austr |
| Muller-Popkes, 1996 | Patients with Insomnia                            | 1. IPT<br>2. Relaxation                                    | 13<br>12              | Ind          | 12           | ? ? ? +  | Ger   |
| Neugebauer, 2006    | Adults with depression                            | 1. IPC<br>2. CAU                                           | 10<br>9               | Ind          | 6            | ? ? + +  | US    |
| O'Hara, 2000        | Adults with MDD                                   | 1. IPT<br>2. WL                                            | 60<br>60              | Ind          | 12           | + - - +  | US    |
| Oranta, 2010        | Depression and stress after myocardial infarction | 1. IPC<br>2. CAU                                           | 51<br>52              | Ind          | 5            | ? ? sr ? | Fin   |
| Poleshuck, 2014     | Major depression and pelvic pain                  | 1. IPT<br>2. referral/CAU                                  | 34<br>28              | Ind          | 8            | + ? ? +  | US    |
| Power, 2012         | Adults with depression                            | 1. IPT<br>2. CBT<br>3. CAU                                 | 39<br>22<br>10        | Ind          | 16           | ? ? + ?  | UK    |
| Ransom, 2008        | Adults with MDD or DYS                            | 1. IPT<br>2. CAU                                           | 41<br>38              | Tel          | 10           | - - + +  | US    |
| Reynolds, 1999 A    | Adults with MDD                                   | 1. IPT+ADM<br>2. ADM                                       | 16<br>25              | Ind          | 16           | - - - +  | US    |
| Reynolds, 1999B     | Patients recovered from MDD                       | 1. mADM+mIPT<br>2. mADM<br>3. mIPT+Placebo<br>4. Placebo   | 25<br>28<br>25<br>29  | Ind          | Mon-<br>thly | + + + +  | US    |
| Reynolds, 2006      | Patients recovered from MDD                       | 1. mADM+mIPT<br>2. mADM<br>3. mIPT+Placebo<br>4. Placebo   | 28<br>35<br>35<br>18  | Ind          | Mon-<br>thly | + + + +  | US    |
| Reynolds, 2010      | Elderly responders to treatment of depression     | 1. IPT + ADM<br>2. ADM                                     | 60<br>64              | Ind          | 12           | + + + +  | US    |
| Rosselló, 1999      | Depressed adolescents                             | 1. IPT<br>2. CBT<br>3. WL                                  | 23<br>25<br>23        | Ind          | 12           | - - + +  | PR    |
| Rosselló, 2008      | Depressed adolescents                             | 1. IPT<br>2. CBT                                           | 60<br>52              | Ind /<br>grp | 12           | + - - +  | PR    |
| Schaal, 2009        | Rwandan genocide orphans with PTSD                | 1. IPT<br>2. Narrative exposure ther.                      | 14<br>12              | Grp          | 4            | - - + +  | Rwan  |
| Schramm, 2007       | Inpatients with MDD                               | 1. IPT+ADM<br>2. ADM                                       | 63<br>61              | Ind /<br>grp | 23           | + + + +  | Ger   |
| Schramm, 2011       | Patients with early onset chronic depression      | 1. CBASB<br>2. IPT                                         | 15<br>15              | Ind          | 23           | + + + -  | Ger   |
| Schulberg, 1996     | Patients with MDD                                 | 1. IPT<br>2. ADM<br>3. CAU                                 | 93<br>91<br>92        | Ind          | 16           | - - + +  | US    |

|                      |                                                          |                                                       |                      |              |    |          |       |
|----------------------|----------------------------------------------------------|-------------------------------------------------------|----------------------|--------------|----|----------|-------|
| Serretti, 2013       | Patients with MDD                                        | 1. IPC<br>2. ADM                                      | 43<br>117            | Ind          | 6  | -- ? -   | Italy |
| Shear, 2005          | Patients with complicated grief                          | 1. IPT<br>2. Complicated grief treatment              | 46<br>49             | Ind          | 16 | + ? + -  | US    |
| Sloane, 1985         | Patients with MDD                                        | 1. IPT<br>2. ADM<br>3. Placebo                        | 19<br>10<br>14       | Ind          | 6  | -- + -   | US    |
| Spinelli, 2003       | Depressed pregnant women                                 | 1. IPT<br>2. PE                                       | 21<br>17             | Ind          | 10 | --- +    | US    |
| Stangier, 2011       | Patients with Social anxiety disorder                    | 1. CBT<br>2. IPT<br>3. WL                             | 38<br>38<br>41       | Ind          | 16 | ++++     | UK    |
| Swartz, 2008         | Patients with MDD                                        | 1. IPT<br>2. CAU                                      | 26<br>21             | Ind          | 9  | -----    | US    |
| Talbot, 2011         | Depressed women with sexual abuse histories              | 1. IPT<br>2. CAU                                      | 34<br>24             | Ind          | 16 | ? ? - +  | US    |
| Tang, 2009           | Patients with MDD                                        | 1. IPT<br>2. CAU                                      | 35<br>38             | Ind          | 12 | -- + -   | TW    |
| Tanofsky-Kraff, 2010 | Adolescent girls at-risk for obesity                     | 1. IPT<br>2. Health education                         | 19<br>19             | Grp          | 12 | ? + ? +  | US    |
| van Schaik, 2006     | Patients with MDD                                        | 1. IPT<br>2. CAU                                      | 69<br>74             | Ind          | 8  | ++++     | NL    |
| Vos, 2012            | Patients with panic disorder with agoraphobia            | 1. CBT<br>2. IPT                                      | 43<br>48             | Ind          | 12 | + + sr + | NL    |
| Weissman, 1979       | Patients with MDD                                        | 1. IPT<br>2. IPT+ADM<br>3. On dem tel. supp<br>4. ADM | 17<br>23<br>21<br>20 | Ind          | 16 | -- + -   | US    |
| Wilfley, 1993        | Patients with Nonpurging bulimia                         | 1. CBT<br>2. IPT<br>3. WL                             | 18<br>18<br>20       | Grp          | 16 | ? ? sr + | US    |
| Wilfley, 2002        | Patients with Binge eating disorder                      | 1. CBT<br>2. IPT                                      | 81<br>81             | Grp          | 20 | ? -- +   | US    |
| Wilson, 2010         | Patients with Binge eating disorder                      | 1. Behav weight l.<br>2. CBT gsh<br>3. IPT            | 64<br>66<br>75       | Ind          | 20 | + ? + +  | US    |
| Young, 2006          | Adolescents with elevated depression                     | 1. IPT<br>2. School-couns.                            | 27<br>14             | Ind /<br>grp | 10 | + ? + +  | US    |
| Young, 2010          | Adolescents with elevated depression                     | 1. IPT<br>2. School-couns.                            | 36<br>21             | Ind /<br>grp | 10 | + ? + +  | US    |
| Zlotnick, 2001       | Pregnant women at risk for PPD                           | 1. IPT<br>2. CAU                                      | 17<br>18             | Grp          | 4  | ? ? ? -  | US    |
| Zlotnick, 2006       | Pregnant women at risk for PPD                           | 1. IPT<br>2. CAU                                      | 53<br>46             | Grp          | 4  | + ? ? -  | US    |
| Zlotnick, 2011       | Low-income pregnant women with intimate partner violence | 1. IPT<br>2. CAU                                      | 28<br>26             | Grp          | 4  | + + ? +  | US    |

<sup>a)</sup> In this column a positive sign, a “?” (when the information was unclear), or a negative sign is given for the four items of risk of bias: allocation sequence; concealment of allocation to conditions; blinding of assessors; and intention-to-treat analyses. For Blinding of assessor we reported “sr” when only self-report outcome measures were used.

**Abbreviations:** ADM: antidepressive medication; Austr: Australia; Behav weight l.: behavioral weight loss; BR: Brasil; BT: Behavior therapy; CA: Canada; CAU: care-as-usual; CBASB: Cognitive Behavioral Analysis System of Psychotherapy; CBT: cognitive behavior therapy; COCT: Coping-oriented couples therapy; Collab care: Collaborative care; Couns: counseling; Family foc. Ther: family focused therapy; Fin: Finland; Ger: Germany; Grp: group; Gsh: guided self-help; iCBT: Internet-based CBT; iIPT: Internet-based IPT; Ind: individual; IPC-t: IPC by telephone; IPC-v: IPC by videophone; IPC: interpersonal counseling; IPT: interpersonal psychotherapy; IS: Israel; M-I therapy: mother-infant therapy; mADM: maintenance ADM; mCBT: maintenance CBT; MDD: major depressive disorder; Med manag: medical management; mIPT: maintenance IPT; N sess: number of sessions; NL: Netherlands; NO: Norway; On dem tel. supp: Telephone support on demand; PE: psychoeducation; Port: Portugal; PR: Puerto Rico; Rwan: Rwanda; Sg: self-

guided; Supp: supportive therapy; Swe: Sweden; Tel: telephone; ther: therapy; TW: Taiwan; UG: Uganda; UK: United Kingdom; US: United States; Vid.ph: videophone; WL: waiting list.

Appendix D. Effects of IPT for acute phase depression versus control groups and versus other psychotherapies: Hedges'  $g$  <sup>a)</sup>

|                                     |                                   | $N_{comp}$ | $g$   | 95% CI      | $I^2$ | 95% CI | $p$ <sup>b)</sup> | NNT |
|-------------------------------------|-----------------------------------|------------|-------|-------------|-------|--------|-------------------|-----|
| <u>IPT vs control groups</u>        |                                   |            |       |             |       |        |                   |     |
|                                     | All studies                       | 31         | 0.60  | 0.45, 0.75  | 63    | 43, 74 |                   | 3   |
|                                     | 2 outliers excluded <sup>c)</sup> | 29         | 0.58  | 0.46, 0.70  | 32    | 0, 56  |                   | 3   |
|                                     | Only HAM-D                        | 14         | 0.52  | 0.36, 0.67  | 24    | 0, 59  |                   | 4   |
| <u>Subgroup analyses</u>            |                                   |            |       |             |       |        |                   |     |
| Recruitment                         | Community                         | 5          | 0.35  | 0.01, 0.69  | 6     | 0, 66  | 0.03              | 5   |
|                                     | Clinical populations              | 11         | 0.48  | 0.26, 0.70  | 0     | 0, 51  |                   | 4   |
|                                     | Other                             | 15         | 0.78  | 0.59, 0.96  | 65    | 32, 79 |                   | 2   |
| Diagnosis                           | Diagnosed mood dis.               | 19         | 0.47  | 0.31, 0.64  | 32    | 0, 60  | 0.01              | 4   |
|                                     | Cutoff / other                    | 12         | 0.81  | 0.60, 1.02  | 65    | 23, 80 |                   | 2   |
| Age group                           | Adolescents                       | 7          | 0.77  | 0.48, 1.06  | 16    | 0, 65  | 0.05              | 2   |
|                                     | Adults                            | 20         | 0.63  | 0.45, 0.80  | 67    | 43, 78 |                   | 3   |
|                                     | Older adults                      | 4          | 0.18  | -0.22, 0.57 | 0     | 0, 68  |                   | 10  |
| Target group                        | Women                             | 11         | 0.64  | 0.38, 0.90  | 0     | 0, 51  | 0.76              | 3   |
|                                     | Other target groups               | 20         | 0.59  | 0.40, 0.77  | 74    | 57, 82 |                   | 3   |
| Format                              | Individual                        | 19         | 0.52  | 0.34, 0.69  | 49    | 0, 69  | 0.34              | 4   |
|                                     | Group                             | 5          | 0.76  | 0.45, 1.08  | 80    | 36, 90 |                   | 2   |
|                                     | Mixed/other                       | 7          | 0.71  | 0.40, 1.02  | 44    | 0, 75  |                   | 3   |
| Country                             | United States                     | 24         | 0.60  | 0.42, 0.78  | 31    | 0, 57  | 0.99              | 3   |
|                                     | Other countries                   | 7          | 0.60  | 0.32, 0.89  | 88    | 76, 92 |                   | 3   |
| Risk of bias                        | High (0-2)                        | 23         | 0.53  | 0.36, 0.70  | 35    | 0, 60  | 0.11              | 3   |
|                                     | Low (3-4)                         | 8          | 0.79  | 0.52, 1.06  | 81    | 60, 89 |                   | 2   |
| Type of control group               | Care as usual                     | 17         | 0.59  | 0.39, 0.79  | 71    | 49, 81 | 0.82              | 3   |
|                                     | Other                             | 14         | 0.62  | 0.39, 0.86  | 50    | 0, 71  |                   | 3   |
| <u>IPT vs other psychotherapies</u> |                                   |            |       |             |       |        |                   |     |
|                                     | All studies                       | 14         | 0.06  | -0.14, 0.26 | 52    | 0, 72  |                   | 29  |
|                                     | Only HAM-D                        | 7          | 0.12  | -0.11, 0.35 | 28    | 0, 69  |                   | 15  |
| One study removed                   | Mixed ind/grp format              | 13         | 0.10  | -0.10, 0.30 | 47    | 0, 71  |                   | 18  |
| <u>Subgroup analyses</u>            |                                   |            |       |             |       |        |                   |     |
| Comparison therapy                  | CBT                               | 8          | 0.00  | -0.24, 0.25 | 51    | 0, 76  | 0.44              | 0   |
|                                     | Other                             | 6          | 0.17  | -0.17, 0.51 | 53    | 0, 79  |                   | 10  |
| Chronic depression/dysth            | No                                | 11         | 0.08  | -0.15, 0.30 | 51    | 0, 74  | 0.69              | 22  |
|                                     | Yes                               | 3          | -0.03 | -0.54, 0.47 | 69    | 0, 89  |                   | 63  |
| Target group                        | Adults                            | 9          | -0.05 | -0.29, 0.20 | 33    | 0, 68  | 0.16              | 36  |
|                                     | Specific target group             | 5          | 0.25  | -0.08, 0.59 | 68    | 0, 85  |                   | 7   |
| Risk of bias                        | High (0-2)                        | 8          | 0.03  | -0.24, 0.31 | 40    | 0, 72  | 0.76              | 63  |
|                                     | Low (3-4)                         | 6          | 0.10  | -0.23, 0.43 | 67    | 0, 84  |                   | 18  |

Abbreviations: CI: Confidence interval;  $N_{comp}$ : number of comparisons; NNT: Numbers-needed-to-treat.

<sup>a)</sup> according to the random effects model.

<sup>b)</sup> the p-values in this column indicate whether the difference between the effect sizes in the subgroups is significant.

<sup>c)</sup> Bolton et al., 2003; Van Schaik et al., 2006

Appendix E. Effects of IPT for acute phase depression versus ADM and combined treatments:  
Hedges' g<sup>a)</sup>

|                                             |                       | $N_{comp}$ | $g$   | 95% CI       | $I^2$ | 95% CI | $p$ <sup>b)</sup> | NNT |
|---------------------------------------------|-----------------------|------------|-------|--------------|-------|--------|-------------------|-----|
| <u>IPT vs pharmacotherapy</u>               |                       |            |       |              |       |        |                   |     |
| All studies                                 |                       | 16         | -0.13 | -0.28, 0.02  | 51    | 0, 71  |                   | 14  |
| 1 outlier excluded <sup>c)</sup>            |                       | 15         | -0.17 | -0.31, -0.04 | 29    | 0, 61  |                   | 10  |
| Only HAM-D                                  |                       | 9          | -0.24 | -0.46, -0.02 | 49    | 0, 75  |                   | 7   |
| One study removed: Group format             |                       | 15         | -0.15 | -0.31, 0.01  | 53    | 0, 72  |                   | 12  |
| Two studies removed: dysthymia patients     |                       | 14         | -0.09 | -0.25, 0.08  | 48    | 0, 71  |                   | 20  |
| <u>Subgroup analyses</u>                    |                       |            |       |              |       |        |                   |     |
| Type of ADM                                 | SSRI                  | 6          | -0.12 | -0.38, 0.14  | 72    | 10, 86 | 0.90              | 15  |
|                                             | TCA                   | 6          | -0.11 | -0.38, 0.17  | 0     | 0, 61  |                   | 16  |
|                                             | Other                 | 4          | -0.21 | -0.56, 0.14  | 60    | 0, 84  |                   | 8   |
| Risk of bias                                | High (0-2)            | 10         | -0.12 | -0.33, 0.09  | 19    | 0, 61  | 0.85              | 15  |
|                                             | Low (3-4)             | 6          | -0.15 | -0.40, 0.10  | 74    | 20, 87 |                   | 12  |
| Target group                                | Adults                | 12         | -0.11 | -0.28, 0.07  | 51    | 0, 73  | 0.54              | 16  |
|                                             | Specific target group | 4          | -0.22 | -0.56, 0.11  | 47    | 0, 81  |                   | 8   |
| <u>Combined versus pharmacotherapy only</u> |                       |            |       |              |       |        |                   |     |
| All studies                                 |                       | 10         | 0.14  | -0.04, 0.33  | 28    | 0, 65  |                   | 13  |
| Only HAM-D                                  |                       | 7          | 0.22  | -0.03, 0.46  | 37    | 0, 72  |                   | 8   |
| <u>Subgroup analyses</u>                    |                       |            |       |              |       |        |                   |     |
| Risk of bias                                | High (0-2)            | 5          | -0.00 | -0.17, 0.16  | 0     | 0, 64  | 0.007             | -   |
|                                             | Low (3-4)             | 5          | 0.48  | 0.17, 0.79   | 0     | 0, 64  |                   | 4   |
| Medication                                  | SSRI                  | 5          | 0.01  | -0.18, 0.21  | 41    | 0, 77  | 0.07              | 167 |
|                                             | Other                 | 5          | 0.32  | 0.05, 0.59   | 0     | 0, 64  |                   | 6   |
| Disorder                                    | Major depression      | 7          | 0.22  | 0.00, 0.45   | 26    | 0, 68  | 0.21              | 8   |
|                                             | Dysthymia             | 3          | -0.01 | -0.31, 0.28  | 0     | 0, 73  |                   | 167 |
| <u>Combined versus IPT only</u>             |                       |            |       |              |       |        |                   |     |
| All studies                                 |                       | 7          | 0.24  | 0.03, 0.46   | 28    | 0, 69  |                   | 7   |
| Only HAM-D                                  |                       | 4          | 0.16  | -0.11, 0.42  | 24    | 0, 75  |                   | 11  |
| <u>Subgroup analyses</u>                    |                       |            |       |              |       |        |                   |     |
| Risk of bias                                | High (0-2)            | 3          | 0.42  | -0.04, 0.88  | 38    | 0, 82  | 0.39              | 4   |
|                                             | Low (3-4)             | 4          | 0.19  | -0.08, 0.46  | 33    | 0, 78  |                   | 9   |

Abbreviations: ADM: antidepressive medication; CI: Confidence interval;  $N_{comp}$ : number of comparisons; NNT: Numbers-needed-to-treat.

<sup>a)</sup> according to the random effects model.

<sup>b)</sup> the p-values in this column indicate whether the difference between the effect sizes in the subgroups is significant.

<sup>c)</sup> Menchetti et al., 2014

Appendix F. Effects of interpersonal psychotherapy on other mental disorders than depression: Hedges'  $g$  <sup>a)</sup>

|                                                     | $N_{comp}$ | $g$   | 95% CI       | $I^2$ | 95% CI | NNT |
|-----------------------------------------------------|------------|-------|--------------|-------|--------|-----|
| <u>Eating disorders</u>                             |            |       |              |       |        |     |
| <u>IPT vs other psychotherapies</u>                 |            |       |              |       |        |     |
| • All outcomes                                      | 8          | -0.15 | -0.32, 0.03  | 0     | 0, 56  | 12  |
| • All behavioral outcomes                           | 8          | -0.22 | -0.39, -0.05 | 0     | 0, 56  | 8   |
| • Weight and BMI                                    | 7          | 0.10  | -0.08, 0.28  | 0     | 0, 58  | 18  |
| • Only CBT (behavioral outcomes)                    | 6          | -0.20 | -0.39, -0.01 | 0     | 0, 61  | 9   |
| • Low risk of bias (behav. outc.)                   | 2          | -0.13 | -0.44, 0.19  | 0     | -      | 14  |
| <u>Specific outcomes</u>                            |            |       |              |       |        |     |
| • Eating concerns (EDE)                             | 4          | -0.30 | -0.54, -0.07 | 0     | 0, 68  | 6   |
| • Restraint (EDE)                                   | 6          | -0.56 | -0.85, -0.27 | 39    | 0, 75  | 3   |
| • Shape concerns (EDE)                              | 4          | -0.12 | -0.35, 0.12  | 0     | 0, 68  | 15  |
| • Weight concerns (EDE)                             | 4          | -0.00 | -0.24, 0.23  | 0     | 0, 68  | -   |
| <u>IPT vs control groups</u>                        | 2          | 0.47  | -0.17, 1.12  | 66    | -      | 4   |
| <u>IPT vs pharmacotherapy in CBT non-responders</u> | 1          | 0.18  | -0.69, 1.04  | 0     | -      | 10  |
| <u>Anxiety disorders</u>                            |            |       |              |       |        |     |
| <u>IPT vs other psychotherapies</u>                 |            |       |              |       |        |     |
| All studies (anxiety outcomes)                      | 6          | -0.16 | -0.39, 0.07  | 21    | 0, 69  | 11  |
| Only CBT (anxiety outcomes)                         | 4          | -0.24 | -0.51, 0.03  | 28    | 0, 76  | 7   |
| Only CBT for SAD (anxiety outcomes)                 | 3          | -0.31 | -0.67, 0.06  | 45    | 0, 83  | 6   |
| Only low risk of bias                               | 3          | -0.33 | -0.59, -0.06 | 13    | 0, 76  | 5   |
| All studies (depression outcomes)                   | 5          | -0.05 | -0.45, 0.35  | 64    | 0, 84  | 36  |
| <u>IPT vs control groups</u>                        |            |       |              |       |        |     |
| All studies (anxiety outcomes)                      | 3          | 0.89  | 0.22, 1.56   | 58    | 0, 86  | 2   |
| All studies (depression outcomes)                   | 3          | 0.82  | 0.45, 1.19   | 0     | 0, 73  | 2   |

Abbreviations: CI: Confidence interval;  $N_{comp}$ : number of comparisons; NNT: Numbers-needed-to-treat.

<sup>a)</sup> according to the random effects model.
